# Supplementary material
Source: MDPI journal article supplement (https://www.mdpi.com/2311-7524/8/1/80)
Supplement: s1 [file s1]

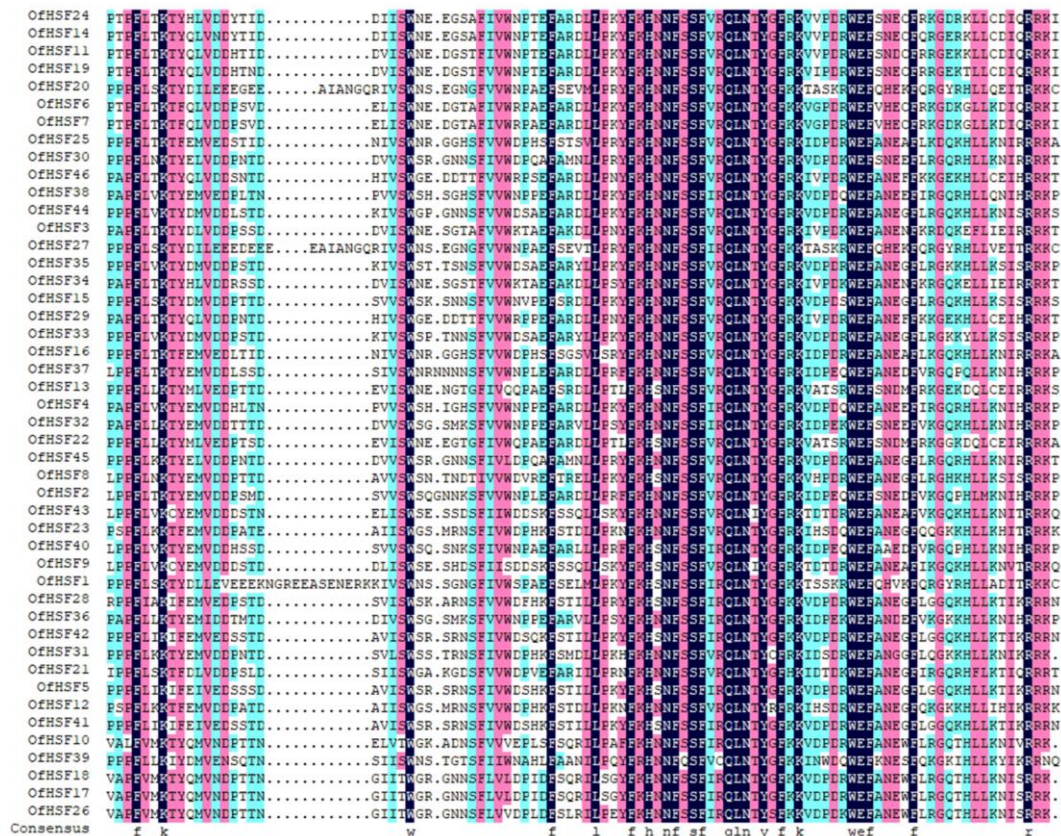

**Figure. S1** Multiple sequence alignment of DNA-binding domains in OfHSFs. The DNA-binding domain sequences of multiple OfHSFs were aligned using ClustalW in MEGA11 software and visualized using DNAMAN software. Entirely conserved residues and 75% conserved residues are represented by the black and pink backgrounds, respectively.
