# Supplementary material
Source: MDPI journal article supplement (https://www.mdpi.com/2311-7524/8/1/80)
Supplement: s1 [file s1]

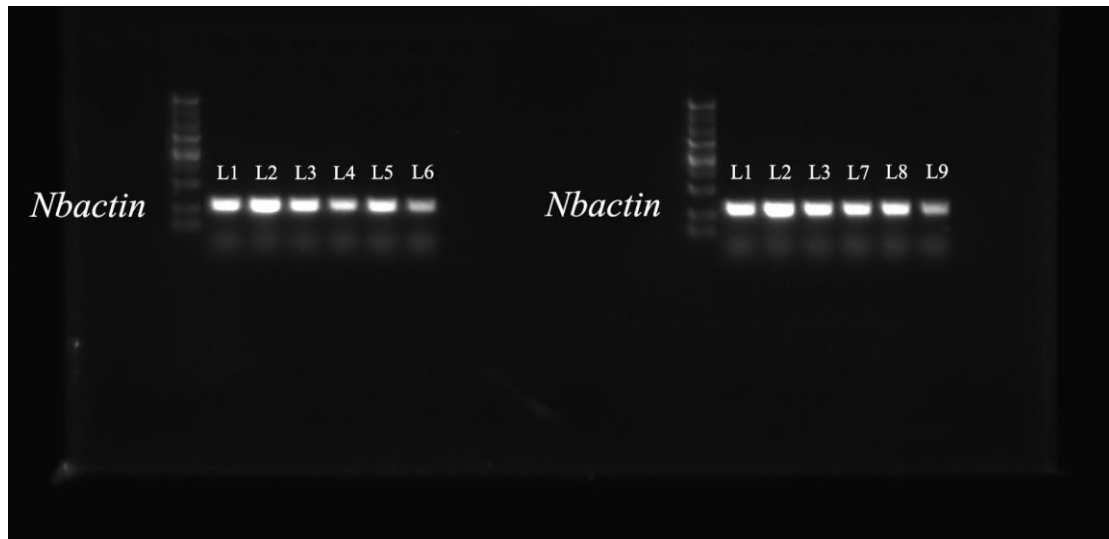

**Figure. S3** A repeat gel image for sqRT-PCR analysis of *Nbactin* expression levels in transiently transformed tobacco. Three biological replicates were infiltrated independently with the empty vector (L1-3), 35S::GFP-OfHSF11 (L4-6) and 35S::GFP-OfHSF43 (L7-9).
