# Supplementary material
Source: MDPI journal article supplement (https://www.mdpi.com/2311-7524/8/1/80)
Supplement: s1 [file s1]

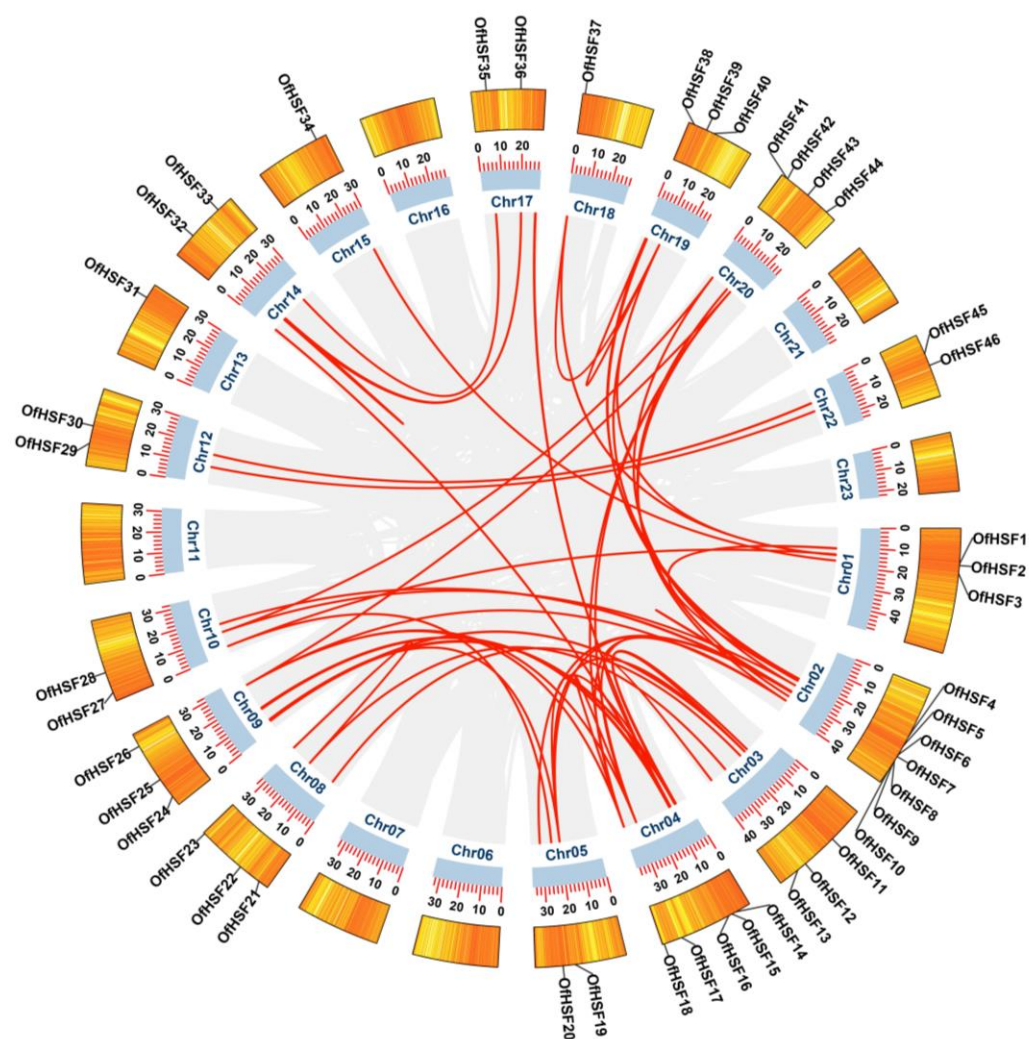

**Figure. S2** The collinearity analysis of 46 *OfHSF* genes. The gene density of the corresponding chromosome is represented by orange rectangles. Blue rectangles represent the 23 chromosomes of *O. fragrans*. Gene segmental duplication pairs of 41 *OfHSFs* are denoted with red lines.
