# Supplementary material
Source: MDPI journal article supplement (https://www.mdpi.com/2311-7524/8/1/80)
Supplement: s1 [file s1]

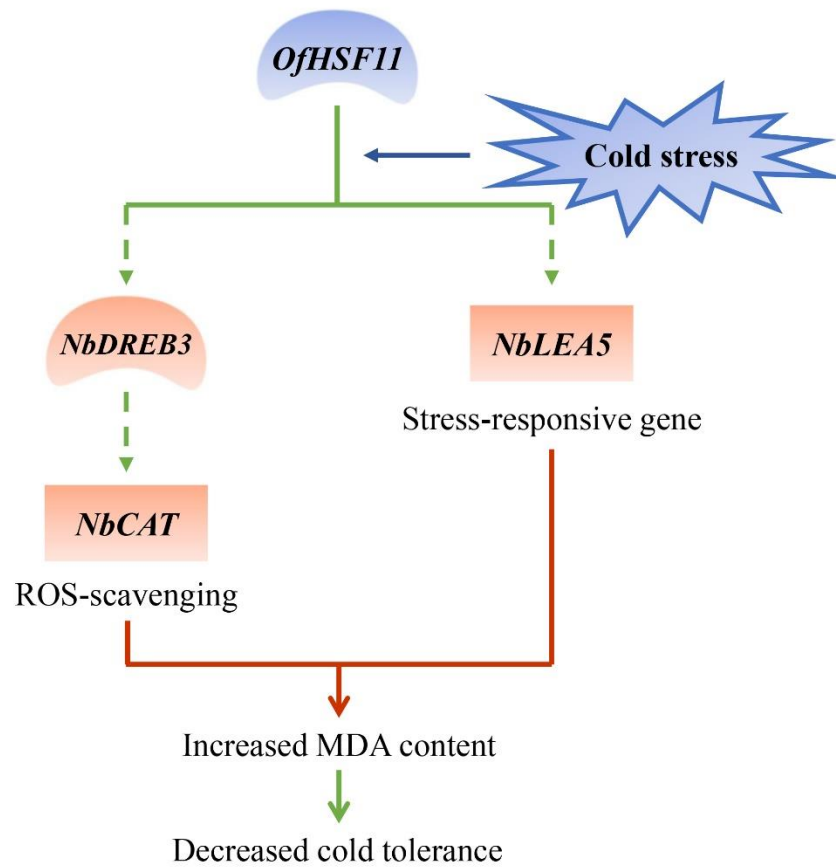

**Figure. S4** A presumed model depicting the *OfHSF11* in the regulation of cold stress tolerance. Green and red arrows represent negative regulation and positive regulation, respectively.
